# Supplementary material for: Predicting gene expression in T cell differentiation from histone modifications and transcription factor binding affinities by linear mixture models
Source: PubMed Central journal article supplement (PMC3044284; doi:10.1186/1471-2105-12-s1-s29), 2011-02-15
Supplement: 1471-2105-12-S1-S29-S1.pdf [file 1471-2105-12-S1-S29-S1.pdf]

# Predicting Gene Expression in T cell Differentiation from Histone Modifications and Transcription Factor Binding Affinities by Linear Mixture Models

Ivan G. Costa<sup>\*1</sup>, Helge G. Roider,<sup>2</sup> Thais G. do Rego,<sup>1</sup> and Francisco de A. T. de Carvalho <sup>1</sup>

<sup>1</sup>Center of Informatics, Federal University of Pernambuco, Recife, Brazil

<sup>2</sup>Dept. of Computational Molecular Biology, Max Planck Institute for Molecular Genetics, Berlin, Germany

Email: Ivan G. Costa\* - [igcf@cin.ufpe.br](mailto:igcf@cin.ufpe.br);

\*Corresponding author

## 1 Supplement

| Gene Name  | MGI Symbol     | Function/Cell Type           | Reference |
|------------|----------------|------------------------------|-----------|
| PU.1       | Trim14         | Myeloid Commit.              | [19]      |
| LyF-1      | Ikaros/Zfpn1a1 | Lymphoid Commit.             | [19]      |
| Ik-3       | Ikaros/Zfpn1a1 | Lymphoid Commit.             | [19]      |
| Aiolos     | Zfpn1a3        | Immt. B Commit               | [19]      |
| E12        | E21,Tcfe2a     | Pro-B Commit                 | [19]      |
| Olf-1      | Ebf            | Pro-B Commit                 | [19]      |
| OCA-B      |                | Mature B                     | [19]      |
| PAX-5      | Pax5           | Pro-B Commit                 | [19]      |
| LEF-1      | Lef1           | Pro-B Commit                 | [19]      |
| SOX4       | SOX4           | Pro-B Commit                 | [19]      |
| IRF-4      | Irf4           | Pre-B Commit                 | [19]      |
| POU2F1     | OCT-1/Slc22a1  | Immat. B                     | [19]      |
| POU2F2     | OCT-2/Slc22a2  | Germ. B                      | [19]      |
| REL-A      | Rela           |                              | [19]      |
| c-REL      | Rel            |                              | [19]      |
| p50        | Nfkb1          | Spleen B                     | [19]      |
| Notch      | Notch1         | T-Cell                       | [19]      |
| CBF1       | RBP-Jk,Rbpsuh  |                              | [19]      |
| Id2        | Id2            | Pro-NK                       | [19]      |
| IRF-8      | IRF8           | Pre-B                        | [18]      |
| Stat4      | Stat4          | Helper T2                    | [1]       |
| Stat6      | Stat6          | Helper T2                    | [1]       |
| C/EBPbeta  | Cebpb          | Bcell                        | [18]      |
| C/EBPgamma | Cebpg          | Bcell                        | [18]      |
| PLZF       | Zbtb16         | Early Lymp.                  | [18]      |
| HOXA10     | Hoxa10         | Early Hemap./ Down in B-cell | [18]      |
| HOXA9      | Hoxa9          | Down Reg. in B-Cell TCell    | [18]      |
| HOXB3      | HoxB3          |                              | [18]      |
| HOXB4      | HoxB4          | HSC                          | [18]      |
| c-MYb      | myb            | EHP                          | [18]      |
| GATA-3     | Gata3          | NK-TCell                     | [18]      |
| Stat3      | Stat3          | IL-6 Signalling [18]         | [18]      |
| SCL        | Ccl21b         | HSC                          | [18]      |
| IRF-1      | Irf1           | Selection of CD8+ T Cells    | [18]      |
| Pax-5      | BSAP           | Pro-B                        | [18]      |
| HEBalt     | Tcf12          | tecell                       | [2]       |
| Bcl11b     | Bcl11b         | tecell                       | [20]      |
| HEBcan     | Tcf12          | tecell                       | [20]      |
| Tcf-1      | Tcf7           | tecell                       | [20]      |
| c-Ets-1    | Ets1           | tecell                       | [20]      |
| Id3        | Id3            | tecell                       | [20]      |
| Lef-1      | Lef1           | tecell                       | [20]      |
| c-Ets-2    | Ets2           | tecell                       | [20]      |
| Spi-B      | SpiB           | tecell                       | [20]      |
| Hes-1      | Hes1           | tecell                       | [20]      |
| Sox13      | Sox13          | tecell                       | [20]      |
| Gfi1       | Gfi1           | tecell                       | [20]      |
| AML1       | Runx1          | tecell                       | [20]      |
| Gata-3     | Gata3          | tecell                       | [20]      |
| E12        | E2A,Tcfe2a     | tecell                       | [20]      |
| RunX3      | Runx3          | tecell                       | [20]      |
| Id2        | Id2            | tecell                       | [20]      |
| PU.1       | Sfpi           | tecell                       | [20]      |
| Sc1        | Tal1           | tecell                       | [20]      |
| Gata-2     | Gata2          | tecell                       | [20]      |
| C/EBPalpha | Cebpa          | tecell                       | [20]      |
| NFAT       |                | td4                          | [1]       |
| Stat1      |                | td4                          | [1]       |
| T-bet      |                | td4                          | [1]       |
| c-MAF      | MAF            | td4                          | [1]       |
| AP1        | AP-1           | td4                          | [1]       |
| FOX3P      |                | td4                          | [1]       |
| RORalpha   |                | td4                          | [1]       |
| RORgamma   |                | td4                          | [1]       |
| RUNX1      |                | td4                          | [1]       |
| Stat5      |                | td4                          | [1]       |

Table 1: List of transcription factors related to Lymphoid development.

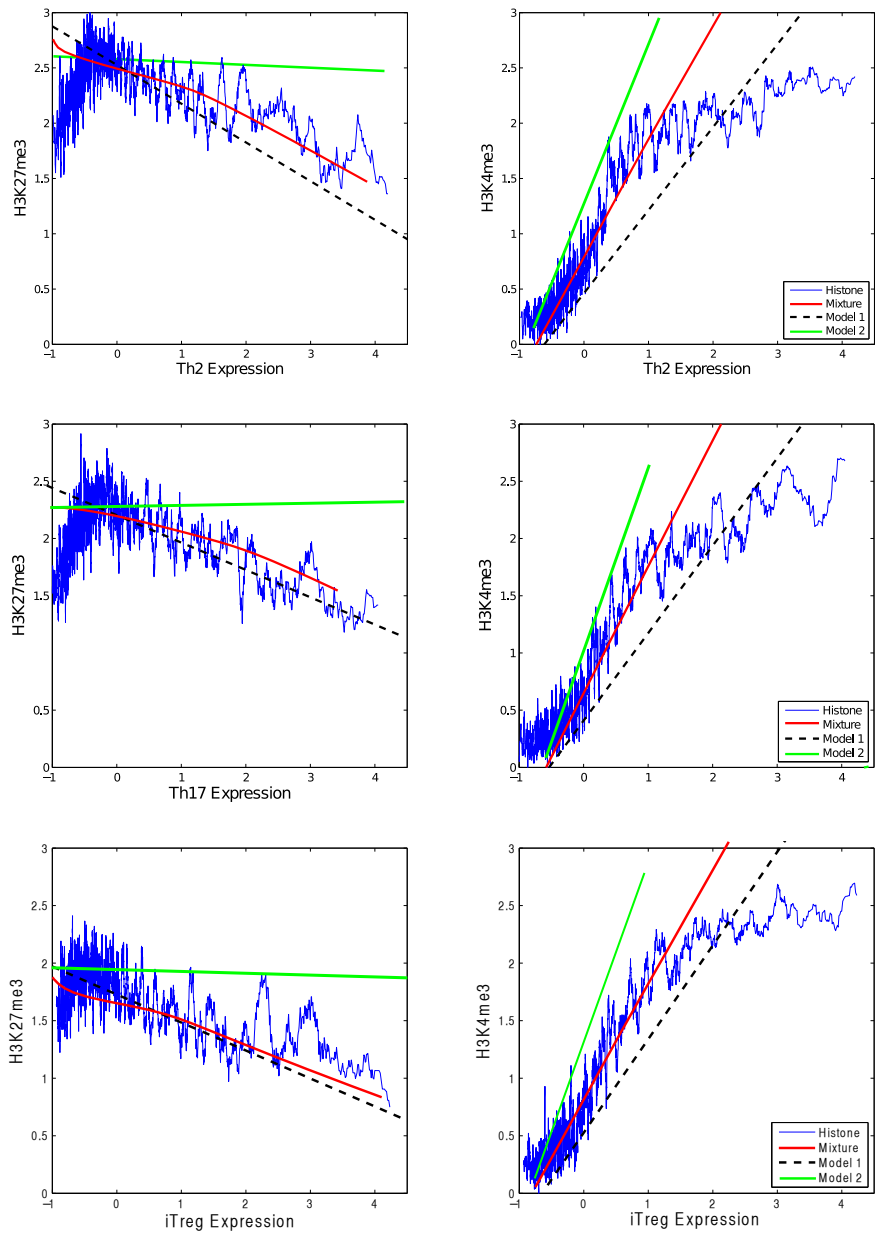

Figure 1: We depict the values of Th2/Th17/iTreg gene expression against H3K27me3 modification (left) and H3K4me3 modification (right). The blue line represents a nearest-neighbor interpolation (30 samples) of the histone modification signal, the dashed black line represents the linear model for the 1 component, the green line for the 2 component and the red curve represents the mean regression value of the mixture of linear regression with 2 components.

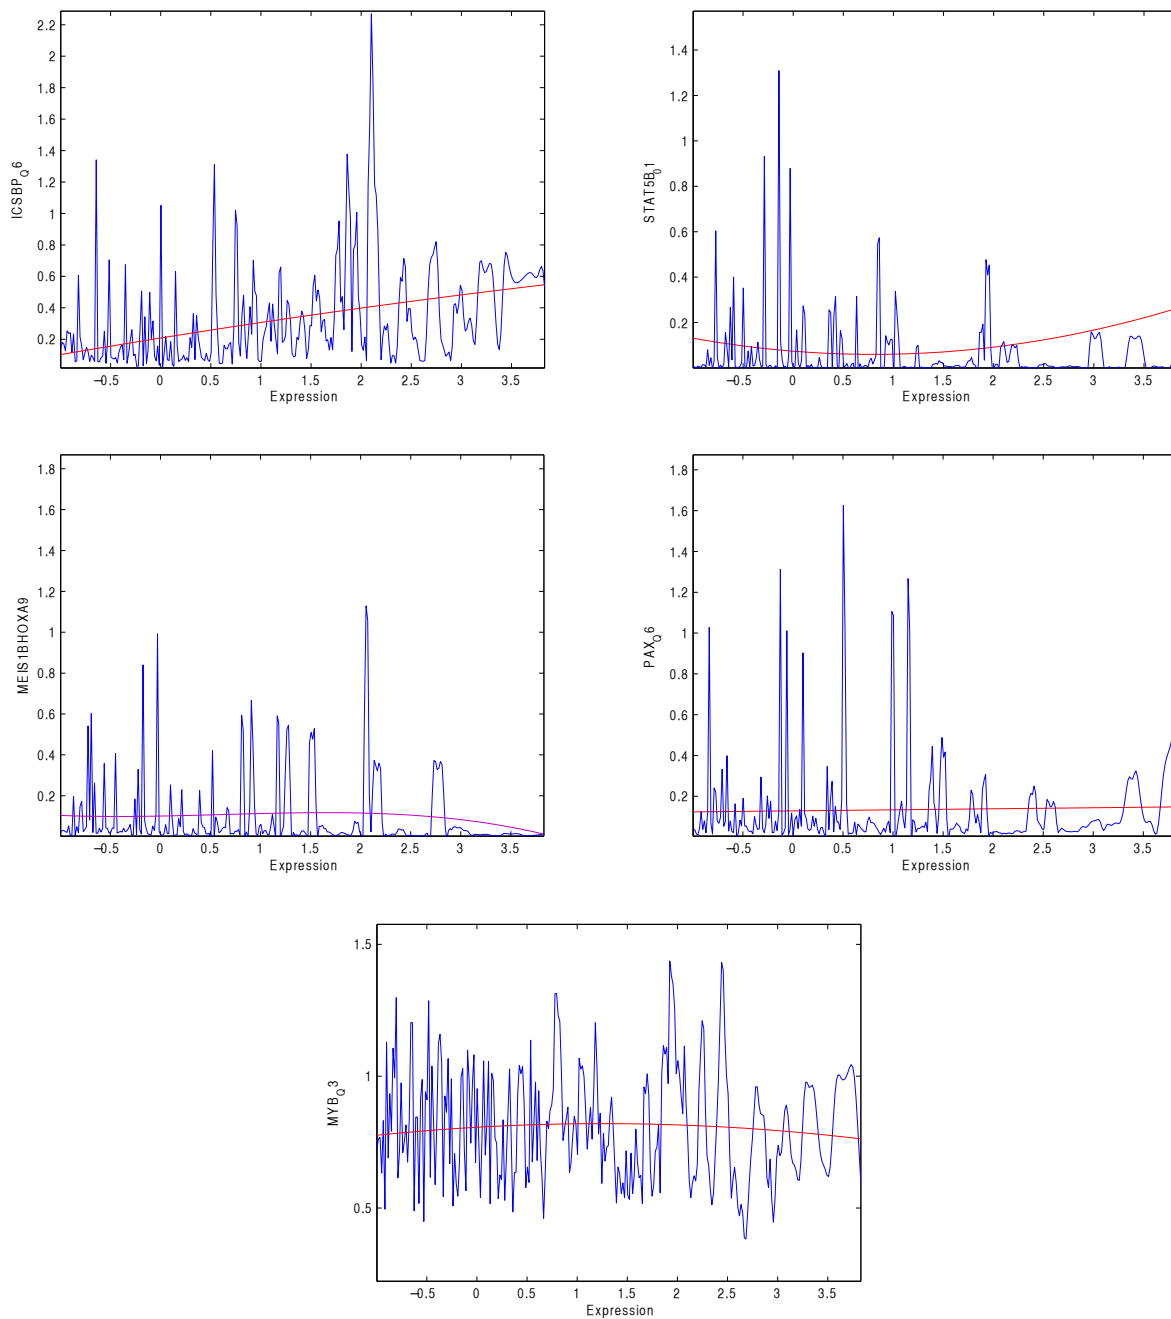

Figure 2: We depict the values of Th1 gene expression against binding affinities of Iscbp, Meis1/Hoxa9, MyB, Pax5 and Stat5. The blue line represents a nearest-neighbor interpolation (30 samples) of the transcription factor affinity signal, the red curve represents the mean regression value of the mixture of linear regression with 3 components. As indicated in Fig 5 of the main manuscript, there is a small tendency of higher affinities of Iscbp, Meis1/Hoxa9, Pax5b and Stat5 for genes with high expression, while there is a small tendency for lower cMyb affinities for genes with high expression.
